# Supplementary material for: M2 Polarization of Human Macrophages Favors Survival of the Intracellular Pathogen Chlamydia pneumoniae
Source: PubMed Central journal article supplement (PMC4659546; doi:10.1371/journal.pone.0143593), 2015-11-25
Supplement: pone.0143593.s001.pdf [file pone.0143593.s001.pdf]

# Supporting Information

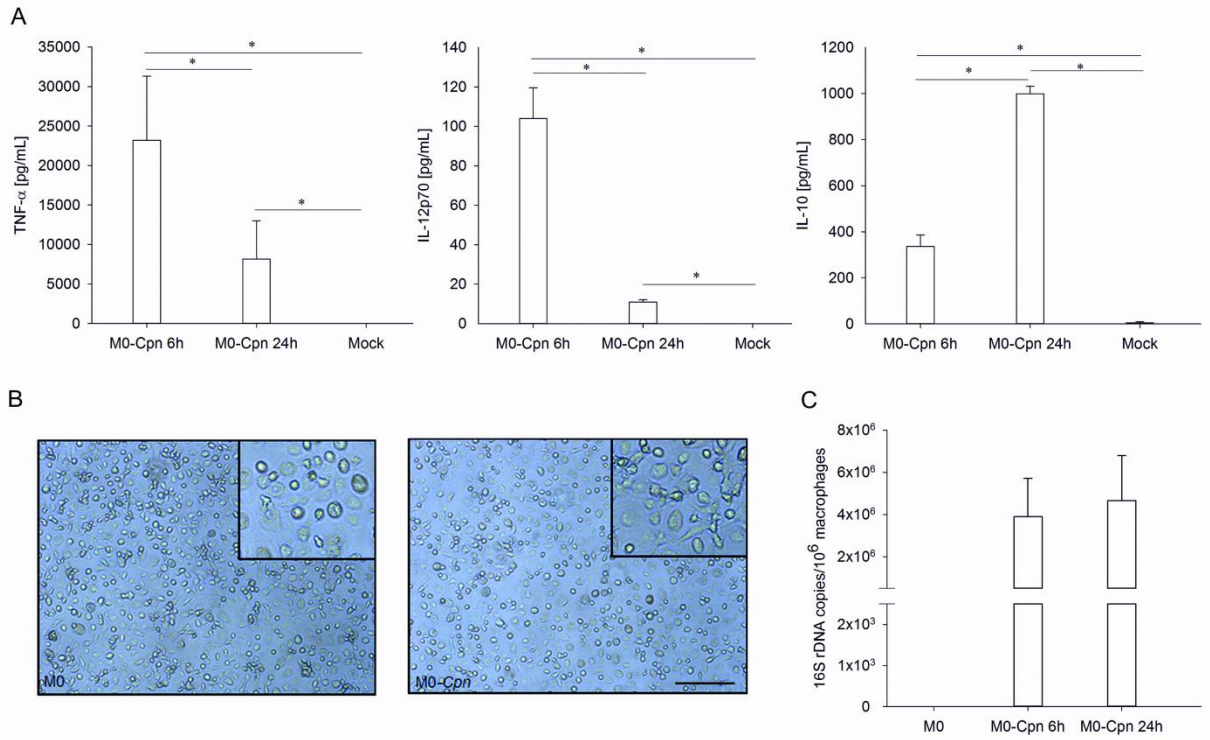

Figure S1
