# Supplementary material for: M2 Polarization of Human Macrophages Favors Survival of the Intracellular Pathogen Chlamydia pneumoniae
Source: PubMed Central journal article supplement (PMC4659546; doi:10.1371/journal.pone.0143593), 2015-11-25
Supplement: pone.0143593.s002.pdf [file pone.0143593.s002.pdf]

## Supporting Information

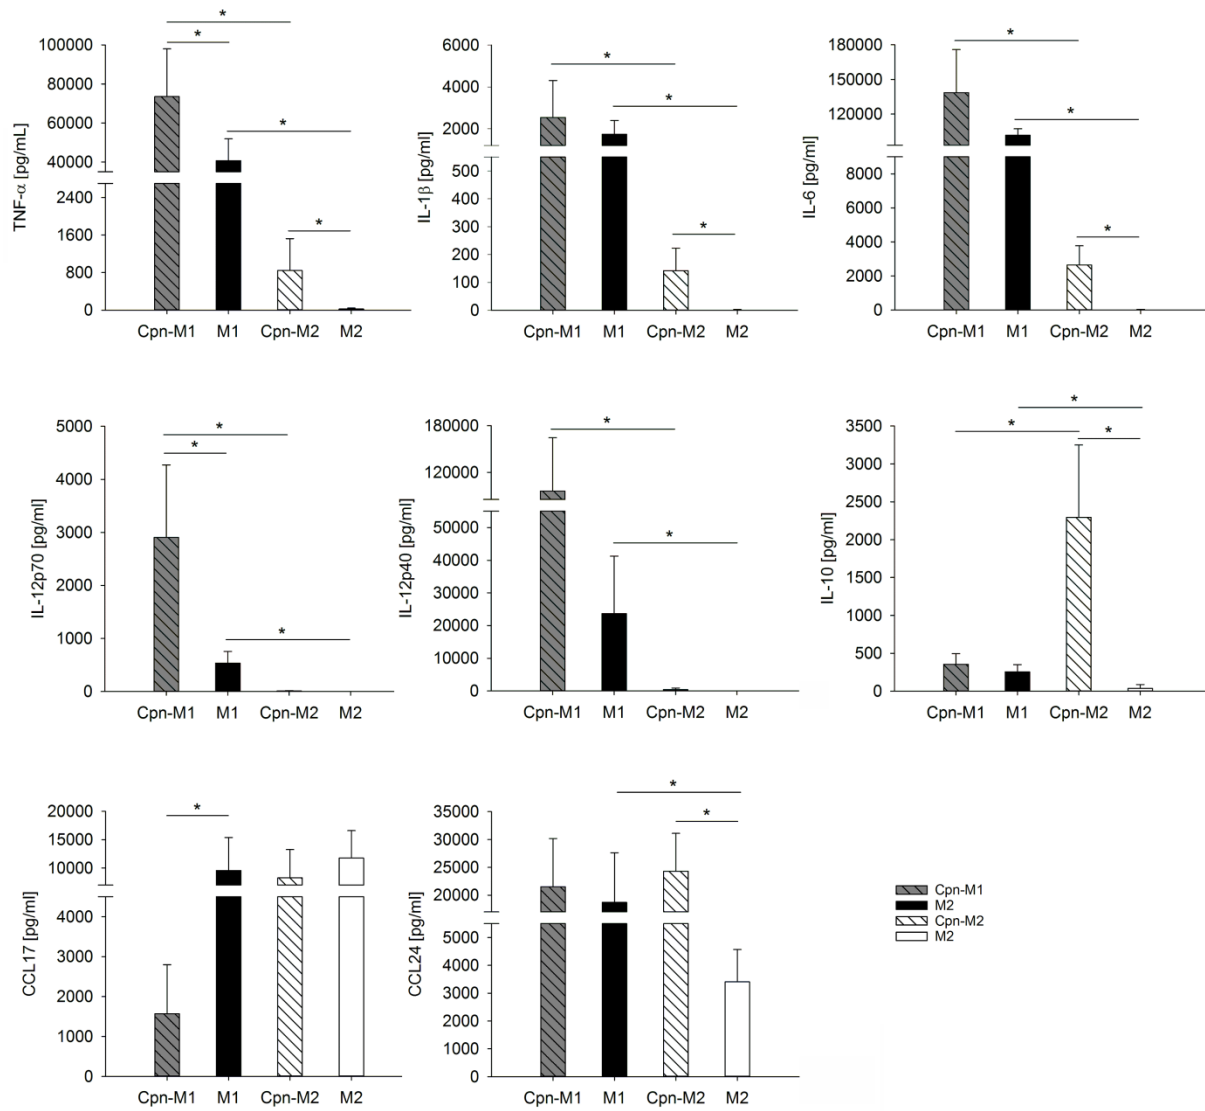

**Figure S2**
